# Supplementary material for: Treatment with Soluble Activin Receptor Type IIB Alters Metabolic Response in Chemotherapy-Induced Cachexia
Source: PubMed Central journal article supplement (PMC6770556; doi:10.3390/cancers11091222), 2019-08-21
Supplement: cancers-11-01222-s001.pdf [file cancers-11-01222-s001.pdf]

## Supplementary Materials

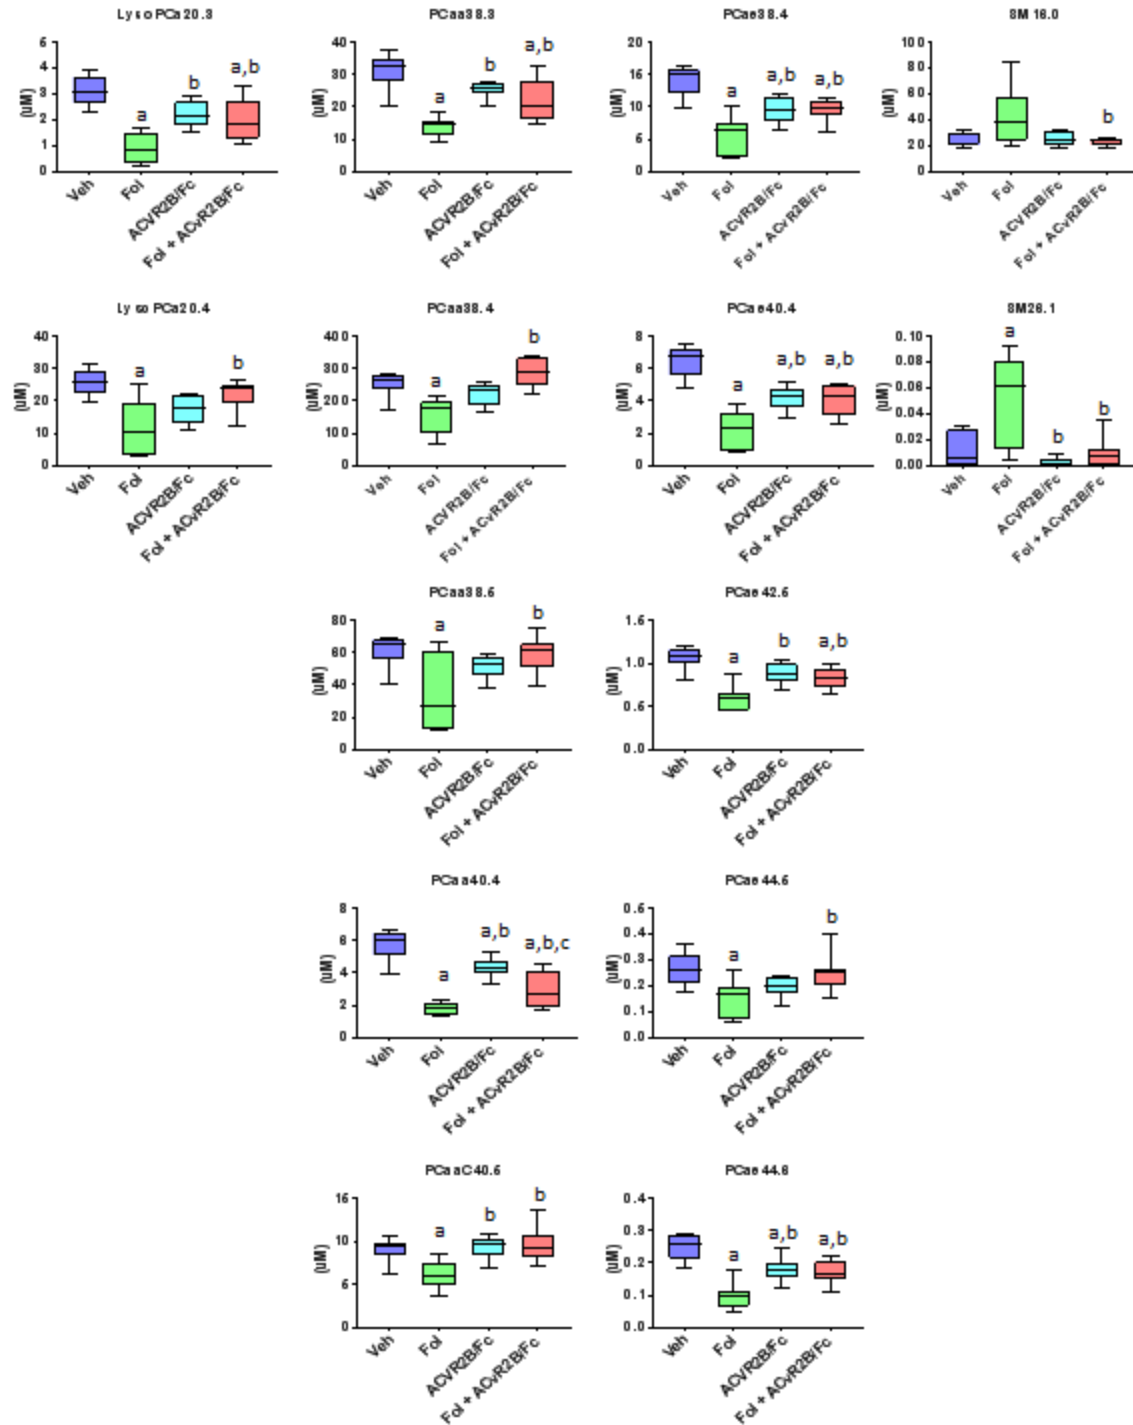

**Figure S1.** Serum lipid changes showing at least one significant inter-group difference. Significance differences include  $p$ -values  $< 0.05$  for a vs. Veh, b vs. Folirif, c vs. ACVR2B/Fc. Metabolites designated as LysoPCa are lysophospholipids. The numbers indicate the total number of carbons and number of unsaturated bonds separated by a period. Glycerophosphochlines are designated with PCaa indicating that the fatty acids at the sn-1 and sn-2 positions are bound via ester linkages or PCae indicating that one of the

fatty acids is bound via an ether linkage. SM indicates sphingomyelins. Significance differences include  $p$ -values  $< 0.05$  for a vs. Veh, b vs. Folfiri, c vs. ACVR2B/Fc.

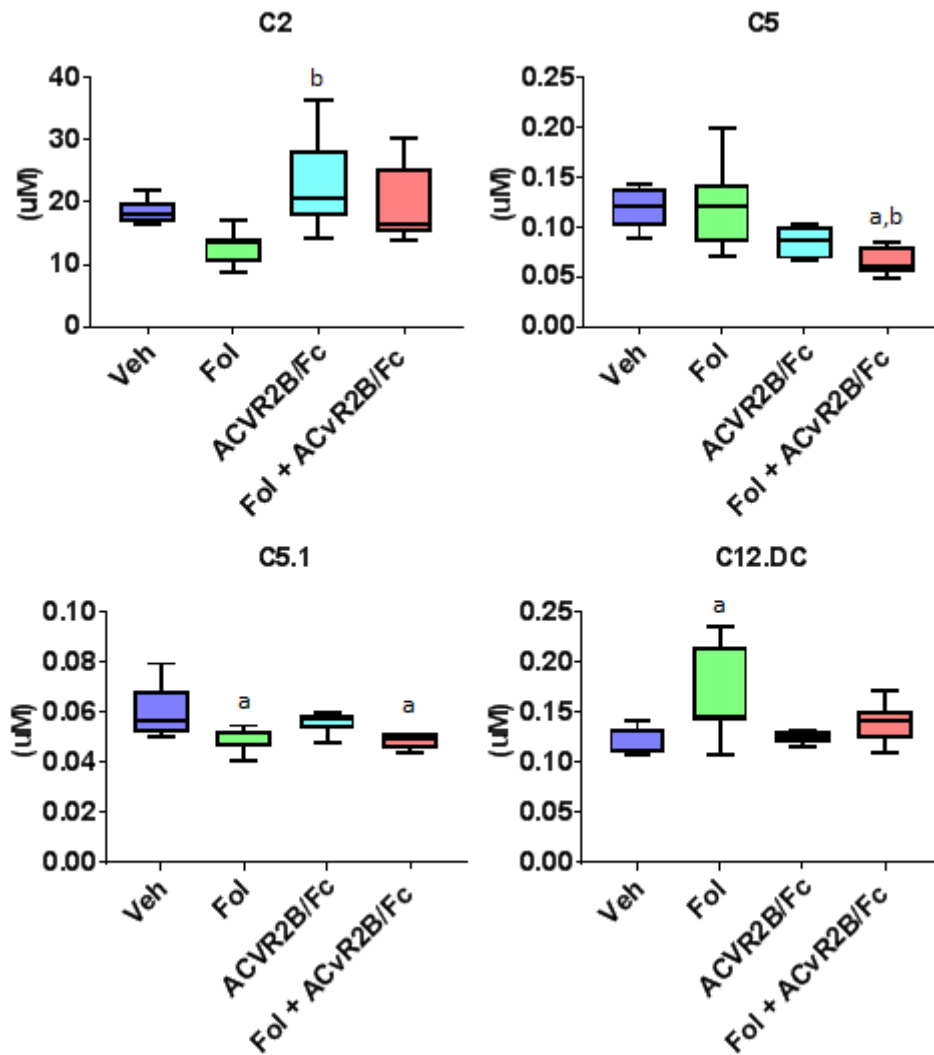

**Figure S2.** Acylcarnitines from skeletal muscle extract showing at least one significant inter-group difference. Significance differences include  $p$ -values  $< 0.05$  for a vs. Veh, b vs. Folfiri, c vs. ACVR2B/Fc. C2, acetylcarnitine; C5, valerylcarnitine; C5.1, tiglylcarnitine; C12-DC, dodecanedioylcarnitine.

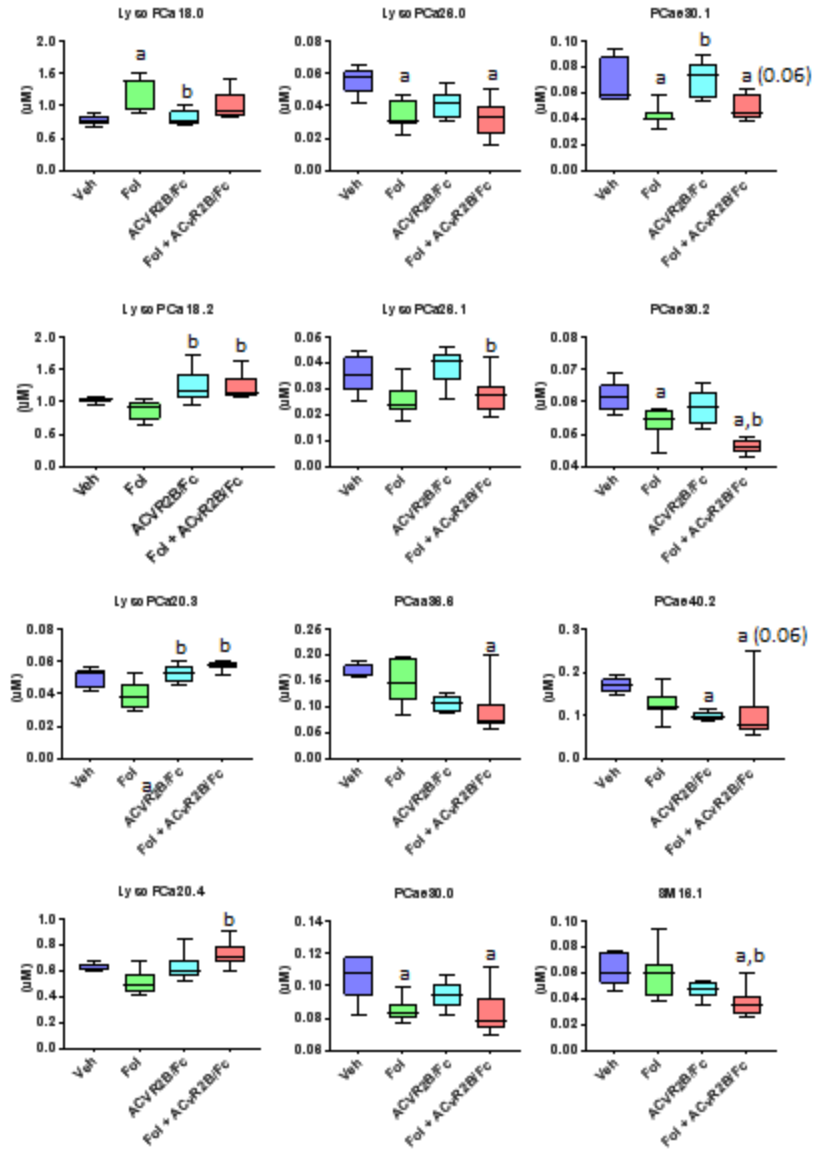

**Figure S3.** Lipid metabolites from skeletal muscle extracts showing at least one significant inter-group difference. Lipid designations are as described for Supplemental Figure 2. Acylcarnitines from skeletal muscle extract. Significance differences include  $p$ -values < 0.05 for a vs. Veh, b vs. Foliricic acid, c vs. ACVR2B/Fc. C2, acetylcarnitine; C5, valerylcarnitine; C5.1, tiglylcarnitine; C12-DC, dodecanedioylcarnitine.
